# Supplementary material for: Six-day selenium supplementation led to either UVA-photoprotection or toxic effects in human fibroblasts depending on the chemical form and dose of Se
Source: Royal Society of Chemistry journal article supplement (doi:10.1039/c4mt00040d), 2014-06-13
Supplement: c4mt00040d1.pdf [file c4mt00040d1.pdf]

### Supplemental Table 1

Lack of effects of 144h SeMet or sodium selenite supplementation on **A.** cell survival 24h after UVA radiation (percentage vs control i.e. neither irradiated nor Se supplemented) **B.** GPX activities (U/g prot) **C.** MDA  $\mu\text{mol/g}$  prot and **D.** thiol-groups (percentage remaining 24h after UVA radiation causing 30% cell death in NHSF). Results are means of  $n > 3$  independent experiments (up to 8 donors)  $\pm$  SD (control = irradiated cells not supplemented).

A.

|                                   | SeMet           | sodium selenite |
|-----------------------------------|-----------------|-----------------|
| Irradiated cells not supplemented | 69,4 $\pm$ 6,78 | 65,9 $\pm$ 7,3  |
| 0,1 $\mu\text{M}$                 | 80,7 $\pm$ 13,6 | 72,2 $\pm$ 10,2 |
| 0,5 $\mu\text{M}$                 | 64,1 $\pm$ 15,1 | 72,0 $\pm$ 9,9  |
| 1 $\mu\text{M}$                   | 62,9 $\pm$ 14,3 | 77,3 $\pm$ 6,1  |
| 5 $\mu\text{M}$                   | 66,6 $\pm$ 18,1 | 64,8 $\pm$ 8,8  |

B.

|                                   | SeMet            | sodium selenite  |
|-----------------------------------|------------------|------------------|
| Irradiated cells not supplemented | 111,9 $\pm$ 29,7 | 104,5 $\pm$ 20,2 |
| 0,1 $\mu\text{M}$                 | 98,6 $\pm$ 35,2  | 77,2 $\pm$ 44,4  |
| 0,5 $\mu\text{M}$                 | 98,5 $\pm$ 21,7  | 97,2 $\pm$ 13,1  |
| 1 $\mu\text{M}$                   | 110,8 $\pm$ 25,7 | 101,1 $\pm$ 11,5 |
| 5 $\mu\text{M}$                   | 105,5 $\pm$ 13,9 | toxic            |

C.

|                                   | SeMet   | sodium selenite |
|-----------------------------------|---------|-----------------|
| Irradiated cells not supplemented |         | 0,6 $\pm$ 0,22  |
| 0,1 $\mu\text{M}$                 |         | 0,47 $\pm$ 0,17 |
| 0,5 $\mu\text{M}$                 | Fig. 4c | 0,51 $\pm$ 0,13 |
| 1 $\mu\text{M}$                   |         | 0,47 $\pm$ 0,12 |
| 5 $\mu\text{M}$                   |         | toxic           |

D.

|                                          | <b>SeMet</b>       | <b>sodium selenite</b> |
|------------------------------------------|--------------------|------------------------|
| <b>Irradiated cells not supplemented</b> | <b>97,5 ± 9,3</b>  | <b>97,3 ± 12,2</b>     |
| <b>0,1 µM</b>                            | <b>105,2 ± 5,5</b> | <b>95,1 ± 13,5</b>     |
| <b>0,5 µM</b>                            | <b>86,7 ± 16,4</b> | <b>97,7 ± 20,0</b>     |
| <b>1 µM</b>                              | <b>87,3 ± 23,8</b> | <b>98,2 ± 10,9</b>     |
| <b>5 µM</b>                              | <b>86,8 ± 8,3</b>  | <b>toxic</b>           |
